1           **Characterization of the pscC (*Type III secretion*) gene of *Pseudomonas aeruginosa***  
2                           **(PA01) and assessment of immunogenicity of pscC protein in rats**

3

4    Bhuiyan SA<sup>1</sup>, Vanitha DJ<sup>1</sup>, Sultana H<sup>2</sup>, Opook, F<sup>1</sup> Rodrigues KF<sup>1</sup>

5    <sup>1</sup> Biotechnology Research Institute, University Malaysia Sabah, 88400 Kota Kinabalu, Sabah,  
6    Malaysia.

7    <sup>2</sup> Rangpur Medical college, Rangpur, Bangladesh

8    Corresponding author: [kennethr@ums.edu.my](mailto:kennethr@ums.edu.my)

9

10   **1. Md Safiul Alam Bhuiyan**

11    Biotechnology Research institute  
12    University Malaysia Sabah, Malaysia  
13    Email: [dr.s\\_alambh@yahoo.com](mailto:dr.s_alambh@yahoo.com)

14   **3. Daisy Vanitha John**

15    Associate Professor  
16    Biotechnology Research Institute  
17    University Malaysia Sabah, Malaysia  
18    Email: [daisyv@ums.edu.my](mailto:daisyv@ums.edu.my)

19   **5. Fernandes Opook**

20    Biotechnology Research Institute  
21    University Malaysia Sabah, Malaysia  
22    Email: [fernandes\\_opk@yahoo.com](mailto:fernandes_opk@yahoo.com)

22

23

24

25

2. **Kenneth Francis Rodrigues**

Associate Professor  
Biotechnology Research Institute  
University Malaysia Sabah, Malaysia  
Email: [kennethr@ums.edu.my](mailto:kennethr@ums.edu.my)

4. **Hafiza Sultana**

Assistant professor,  
Department of Microbiology and Immunology  
Rangpur Medical College, Rangpur, Bangladesh  
Email: [dr.hafizasultana@yahoo.com](mailto:dr.hafizasultana@yahoo.com)

26 **ABSTRACT**

27 **Proteins associated with the bacterial membrane can be recruited for application as**  
28 **antigens for the development of vaccines. This preliminary study was directed towards**  
29 **evaluating the antigenic properties of the *Pseudomonas aeruginosa* (PA01) pscC protein**  
30 **which is a component of the Type III secretion system. Gene specific primers were**  
31 **designed to isolate the *pscC* gene which was isolated, ligated onto the multiple cloning**  
32 **site of vector pGS21(a), cloned and expressed in *Escherichia coli* (BL21). The molecular**  
33 **weight of the expressed pscC protein was determined by SDS-PAGE (10% sodium**  
34 **dodecyl sulphate-polyacrylamide gel electrophoresis) and was found to be around 57**  
35 **KDa and purified by the size exclusion chromatography. Finally, the purified pscC**  
36 **protein was injected subcutaneously into adult Sprague Dawley® rats with a range of**  
37 **concentrations (50, 100 and 150 µg per rat) respectively. Recombinant pscC antigen**  
38 **induced a specific humoral immune response against the antigen, which was validated**  
39 **by Enzyme-linked immunosorbent assay (ELISA). The results concluded that anti-pscC**  
40 **antibody was elicited in the animal model.**

41

42

43 ***Key words:***

44 *Pseudomonas aeruginosa*, pscC gene, type III secretion system.

45

46

47

## 48 1. INTRODUCTION

49 *Pseudomonas aeruginosa* is a versatile Gram negative aerobic bacillus, found in a wide  
50 range of environmental habitats. This opportunistic pathogen causes both acute and chronic  
51 infections in patients with hospital-acquired pneumonia [1]. It has been classified as the  
52 fourth leading cause of nosocomial infection and is associated with cystic fibrosis; burn  
53 wound infection, and pneumonic septicaemia [2] [3]. Due to recurrent causes of nosocomial  
54 infections *Pseudomonas* infections have become more complex and life-threatening  
55 infection, as standard treatments are becoming ultimately ineffective. This organism exhibits  
56 intense signs of antibiotic resistance to a wide variety of antimicrobial treatments, including  
57 Beta-lactams, Chloramphenicol and Fluoroquinolone [4]. Therefore, specific immune therapy  
58 is more desirable than conventional antibiotic therapy [5].

59 It is an urgent demand of time to implement therapeutic vaccination schemes against  
60 *Pseudomonas* infections. *P. aeruginosa* have its own type III secretion system (T3SS), with a  
61 protein translocation apparatus and the effector proteins which can be injected into host cells.  
62 The secretion and translocation stages comprise over 20 proteins gathered into a needle-like  
63 structure termed as injectisome [6]. The T3SS is the part of important virulence determinants  
64 of *P. aeruginosa*, in which the pscC protein is a fundamental part of the needle tip for *P.*  
65 *aeruginosa* (Fig 1). The pscC protein has been established to be an important protective  
66 antigen of the bacterium and regulate the secretion of translocator proteins to attach with host  
67 cell membranes. Once the bacterium interacts with host cell membranes, the T3SS system is  
68 activated and this in turn inhibits signal transduction resulting in cellular cytotoxicity or  
69 changes in the host immune responses. The T3SS antigen may react with the host cell, whose  
70 maximum component should play a significant role in the host immunity. Therefore,  
71 immunization against T3SS antigen can prevent translocon association. However, the

72 functional and regulatory information about this multi-mechanism of pscC antigen will  
73 facilitated for the design of novel recombinant vaccines as well as therapeutics.

74 Effective vaccines are designed to stimulate the innate immune response, as well as  
75 carry antigens to specific sub-cellular sites for the elicitation of antigen-specific cytotoxic T  
76 cells. Physical delivery to specific locations within a cell is one of the major challenges when  
77 developing a suitable candidate for T3SS antigen as a vaccine. Secretory needle antigens of  
78 T3SS are easily processed through T3SS pathways. These complexes form a host pathogen  
79 interaction is important to identify the molecular pathogenesis for developing an effective  
80 vaccine. As a result, the secretory T3SS antigen directly stimulates antigen-specific cytotoxic  
81 T cells through the delivery of antigens to the antigen presenting cells (APC), causing a  
82 humoral immune response [7] [8]. The proteins for transportation of T3SS pathway have  
83 distinct signals that direct them to the secretion machine to stimulate T-helper cells,  
84 conferring protection to a diversity of infectious diseases [9].

85 The preliminary aim of this study was to determine the immune response of the T3SS  
86 pscC antigen elicited in animal model. It has been suggested that recombinant or purified  
87 protein immunization may allow long-term persistence of immunogenic action in host cells  
88 without any risk of infection [10] [11]. Th1 and Th2 cells collectively responses on either Ag  
89 are in the secretory product (Th2) or an intracellular or membrane-anchored molecule [12].  
90 These approaches are mostly reliant on the antigen presentation which has been capable to  
91 improve immune stimulation to recombinant vaccines. Clinical trials have attested to the  
92 safety, efficiency and efficacy, as well as wide application of this immunization technique  
93 [13]. The cell surface display of a heterologous antigenic determinant is advantageous for the  
94 induction of an antibody against a specific antigen. The orientation of target antigens has  
95 been used to develop recombinant vaccines for immunization on rats for the capture and  
96 detection of an antibody from serum [14]. The recombinant version of the pscC needle

97 protein of *P. aeruginosa* can be used as a specific antigen for indirect ELISA to screen the  
98 antibodies generated against specific protein in response to immunization of the rats.

99

## 100 **2. MATERIALS AND METHODS**

### 101 **2.1 Growth of *Pseudomonas aeruginosa* (PA01) and Isolation of Bacterial DNA**

102 The *Pseudomonas aeruginosa* PA01 culture was obtained from the ATCC. Cultures of *P.*  
103 *aeruginosa* were grown in autoclaved LB (Luria-Bertani) broth and agar containing peptone  
104 (10g/L), Yeast extract (5g/L), NaCl (10g/L) and agar (15g/L). Bacterial DNA isolation was  
105 performed via following Aljanabi and Martinez method which was used for rapid salt  
106 extraction of high quality genomic DNA for PCR base technique [15]. The plasmid vectors  
107 pGS-21a (Gene script, New Jersey, USA) was used as vector for cloning and expression. The  
108 complete Freund's adjuvant (Sigma, USA) was used as an adjuvant for delivery of protein in  
109 rats. LB media containing 100µg/ml of ampicillin were used to grow *E.coli* clones at 37°C.

110

### 111 **2.2 Development of gene constructs for expression of recombinant pscC gene.**

112 PCR amplification of pscC gene (1.46kb) of *P. Aeruginosa* was performed using specific  
113 primers. Primers were designed according to the pscC gene sequence which was retrieved  
114 from the NCBI GenBank (NP\_250407). Then nucleotides were selected from both 5' and 3'  
115 ends of the pscC gene and restriction sites for *EcoRI* and *HindIII* were introduced at the 5'  
116 and 3' ends respectively in order to facilitate cloning. The forward primer:  
117 TCAGaattcCCAGCCTGCCTTACGACTAT, with the restriction site for *EcoRI*, and Reverse  
118 primer: CGC-ccatgg-CAACTCGTCGATTCAAGCA, with the restriction site for *HindIII*.  
119 Amplification of the gene was performed 20 µl of total volume containing 2 µl DNA as a  
120 template, 4 µl of 5×PCR buffer (Promega), 1.2 µl 1.5Mm Mgcl<sub>2</sub> (Promega), 0.2 µl of 10 Mm  
121 dNTPs (Promega), 0.2 µl of tag polymerase (Fermentas, USA), 2 µl of primer (1st BASE

122 Laboratories, Malaysia) oligonucleotides (Forward & Reverse), and 10.4  $\mu$ l sterilizes distilled  
123 water.

124 The amplification was performed in a thermal cycle program for initial denaturation at 96°C  
125 for 3 min, 30 cycles of 20 Sec at 94°C, 40 Sec at 56°C and 2 min at 72°C. After final  
126 extension of 10 min at 72°C, the sample was cool to 4°C. The presence and yield of specific  
127 PCR products of approximately 1,500 base-pair was confirmed by gel electrophoresis in 1%  
128 agarose gel. DNA samples were loaded in wells and the electrophoresis was carried out at  
129 100 volts. Then the DNA bands were visualized under ultraviolet (UV) trans-illuminator.

130

### 131 **2.3 Cloning and expression of *pscC* gene**

132 The PCR products were purified using the gel purification kit according to the manufacturer's  
133 instructions (Fermentas, USA). The purified PCR product was cloned into the pGS-21a  
134 vector containing T7 promoter to induce the expression of the cloned gene and selected  
135 *EcoRI* and *HindIII* were the appropriate restriction sites on pGS-21a vector. Plasmid pGS-  
136 21a and *pscC* gene (PCR products) were further double digested with *EcoRI* and *HindIII*  
137 (New England Biolabs, Inc, Beverly, MA). The PCR product of the *pscC* gene was ligated  
138 into the vector using T4 DNA ligase (Fermentas, USA) according to the manufacturer's  
139 instructions. The ligation product was used to transform into *E. coli* of Top10 competent cells  
140 by  $\text{CaCl}_2$  method [16]. The insert plasmids were identified by colony PCR. The inserted  
141 sequence and its reading frame were confirmed by *EcoRI* and *HindIII* digestion and DNA  
142 sequence analysis. The generated pGS-*pscC* inserted plasmid was again sub-cloned into  
143 competent expression cells of *E. coli* BL21 (DE3) following same method described as  
144 cloned of Top10 competent cells.

145 The transformant cells were inoculated into the LB containing ampicillin in test tubes  
146 and incubated at 37°C for 16 hours with continuous stirring (200 xg) until the optical cell

147 density reached 0.4-0.6 at OD<sub>600</sub>. Subsequently, the culture was induced with 0.5mM IPTG  
148 and maintained at 37°C on a rotary shaker set at 200xg. The un-induced sample (1 ml) was  
149 withdrawn prior to induction for used as a control. Afterwards, induced sample was taken  
150 hourly and last sample was picked after 16 hours of induction to observe the time course  
151 study of the expression. The soluble and insoluble fractions were obtained by treating the  
152 pellet with 1ml of PBS (Phosphate Buffer Saline) and lysed using ultra sonication on ice. The  
153 insoluble fractions of the protein were run in the 10% SDS-PAGE gel using coomassie  
154 Brilliant blue with protein marker (Bio-5150, 1st BASE). After extraction of the intense  
155 protein gel, the identification of protein by mass spectrometry was performed. Peptides were  
156 extracted according to the Brangan's methods followed by digestion with trypsin which was  
157 analyzed using MALDITOF-TOF mass spectrometer with proteomics Analyzer (48000) [17].  
158 Spectra were analyzed to identify the protein of interest by Mascot sequence matching  
159 software with Ludwig NR Database.

160

#### 161 **2.4 Purification and Immunization of pscC protein in rats**

162 The soluble fraction of pscC protein was purified by using by Size exclusion chromatography  
163 (SEC). The SEC system (Akta Prime) was calibrated according to the supplier's instruction.  
164 S-100HR column (GE Healthcare) attached to the Akta Prime System was equilibrated using  
165 0.05M Sodium Phosphate, 0.15M NaCl, pH 7.2 at a flow rate of 2.6ml/min. The possible  
166 fractions were generated through the significant peaks and collected the specific column for  
167 desired protein by chloroform/methanol precipitation method. The fractions were further  
168 analysed using 10% SDS-PAGE with Pre-staining Protein Marker.

169 The male adult Sprague-Dawley Rats (4-8 weeks old) weighing 150-200gms were  
170 obtained from Tes Jaya laboratory services, Pulau Pinang, Malaysia. All these animals were  
171 acclimatized and quarantined before commencement of the experiment. This study had

172 approval from the Animal Care and Use Committee and Institutional Biosafety Committee  
173 (IACUC), Malaysia prior setup the experimental design. Animals were reared in plastic cages  
174 using paddy husk bedding at room temperature ( $25 \pm 1^\circ\text{C}$ ) and humidity ( $50 \pm 5\%$ ) in BSL-1.  
175 For evaluation of the immunogenicity of pscC protein, soluble protein was administrated in  
176 rats with various doses [Low (50  $\mu\text{g}$ ), medium (100 $\mu\text{g}$ ) and high (150 $\mu\text{g}$ )]. Rats were  
177 randomly assigned to four groups composed of 6 animals in each. Standard restraints were  
178 used during the injection. Group 1 received 100  $\mu\text{l}$  0.1 M phosphate buffered saline (PBS)  
179 with equal of complete Freund's adjuvant (Sigma, USA) via the subcutaneous route as a  
180 control. The Group 2 immunized with 50  $\mu\text{g}$  of total soluble protein mixed with the same  
181 volume of complete Freund's adjuvant. The group 3 & 4 were injected following the same  
182 technique with the equivalent of same adjuvant which was treated with 100 $\mu\text{g}$  (medium) and  
183 150 $\mu\text{g}$  (High) in every 5 weeks. Serum antibody was measured by indirect ELISA and  
184 antibody level responds of immunized rat sera which were collected on 7, 14, 21, 28 and 35  
185 days after a single dose of administration. Retro-orbital bleeding was done for blood  
186 collection and blood samples were collected under general anaesthesia (95% Diethyl ether  
187 with enclosed induction chamber). Serum samples from immunized and control rats were  
188 centrifuged at 11,600xg, and stored at  $-80^\circ\text{C}$ . The collected sera were subjected to enzyme-  
189 linked immunosorbent assay (ELISA) assay for the determination of the level of antibodies in  
190 sera.

191

## 192 **2.5 Enzyme-linked immune-sorbent assay (ELISA)**

193 Each sample was screened by indirect ELISA for specific immunoglobulin IgG+IgA (H+L  
194 chain specific) using goat anti rat-antibody (Southern Biotech, USA). The recombinant  
195 antigen was mixed and poured into the 96-well Polystyrene micro-titre (Membrane solution,  
196 USA) plates. After coating the antigenic samples, the micro plates were covered and



217 incubated on a shaker at 4°C for 16hours which was washed three times with 100µl 0.05%  
218 (V/V) Tween 20 in PBS, blocked by adding 150 µl of PBS -3%(W/V) BSA followed by  
219 incubation for 90min at room temperature. Control and test sera were diluted 1:100 in the  
220 blocking agent of PBS-A-0.5% to which 0.05% of Tween 20 was added. Further, after the  
221 serial dilution of serum samples at 1:300, 1:600 & 1:900 they were loaded to the micro plate  
222 separately and incubated. The plates were washed and applied on goat anti-rat IgM+ IgG  
223 antibodies followed by incubation and another wash step. 100 µl of conjugated alkaline  
224 phosphatase secondary Abs in PBS-1% and BSA (1/1000) was added to the wells and  
225 incubated at room temperature followed by the wash step. P-Nitro phenyl phosphate  
226 (Southern Biotech, Birmingham) substrate tablet (5mg/tablet) was dissolved in DSB  
227 (1tablet/15ml of DSB) buffer. Subsequently, 100µl of substrate solution was mixed to all  
228 tests well and kept at room temperature for 15min until a yellow colour developed. The  
229 optical density (OD) was measured using an ELISA plate reader (Infinite ® M-200 PRO,  
230 TECAN). The OD results of all samples were calculated as percentage of positive control by  
231 using the OD value of the positive control serum by deducting the average OD value of blank  
232 serum.

### 233 **3. RESULTS AND DISCUSSION**

#### 234 **3.1 Plasmid DNA constructions**

235 PCR amplified product was run on a 1% agarose gel and desired band for the respective  
236 target pscC gene was found without any primer and dimer. The PCR fragments were found to  
237 be approximately 1.46 kb (Figure 2A) amplified from the genomic DNA.

238 After confirmation, the PCR products were excised out of the agarose gel and purified  
239 using a gel extraction kit and digested with restricted enzyme for conformation which was  
240 represented in Figure 2B. The synthesized PCR product was then ready for cloning into pGS-  
241 21a plasmid vector. The pGS-21a plasmid was constructed by PCR amplification of the

222 coding region of pscC with *EcoRI* and *HindIII* sites and ligating the pGS-21a vector cut with  
223 the same enzymes. To determine whether the pscC fragment was successfully ligated in the  
224 pGS-21a plasmid, which were then digested with the *EcoRI* and *HindIII* to release the  
225 expected size of pscC gene. After 1% agarose gel examination, the RE mixture exposed the  
226 presence of two bands. The upper band was consistent to linear according to plasmid size  
227 (Approximately 6.2 kb) and another band was corresponding to the expected molecular size  
228 of pscC gene around 1.46kb.

### 229 **3.2 Cloning and expression of pscC gene in *E. coli***

230 The pGS-21a plasmid was transferred to *E. coli* TOP10 and BL21 (D3) and confirmed  
231 respectively by restriction digestion, colony PCR and sequencing. The clones were subjected  
232 to colony PCR and an amplified 1.46 kb band was obtained as that of positive control. The  
233 plasmid showed the presence of 1kb insert and clones were confirmed through PCR and  
234 restriction analysis in Figure 3. The PCR positive recombinant clones were also subjected to  
235 restriction digestion using *EcoRI* and *HindIII*. The presence of about 1.46kb insert was  
236 confirmed by electrophoresis and the positive clone was sequenced with T7 promoter primer  
237 (Forward and Reverse). Later than confirmation, clones were further subjected to plasmid  
238 extraction, followed by RE and plasmid sequence analysis.

239 The sequences were then analyzed via BLAST, compared with the reference  
240 sequences formerly deposited in NCBI. The sequences was compared to the NCBI database  
241 which was revealed about 97% similarity compared the sequences of pscC in BLASTn  
242 algorithm. As of the colony PCR the pGS-21a with inserted pscC gene was found  
243 approximately 1.46kb size and control showed the 1.0kb. Therefore, it can be concluded that  
244 the recombinant plasmid carried the targeted pscC gene.

245 The protein expression was observed in host strains of *E.coli* BL21 (D3) cells and the  
246 most prominent band was appeared at ~84 kDa in 4 samples which was illustrated in Figure

247 4. The soluble and insoluble fractions were obtained by re-suspending the cell pellet in buffer  
248 and sonicated on ice. The slightly visible soluble band for scarce was detected in supernatant  
249 phase after visualized under SDS-PAGE (Figure 5). Consequently, a prominent band of the  
250 target protein pscC appeared which was visually distinguishable from other proteins based  
251 the un-induced controls. Recombinant *E. coli* also showed a distinct band with an  
252 approximate cumulative size of ~57 kDa with His tag (6XHis) and GST Tag at the size of  
253 1kDa & 26kDa respectively. For further substantiation, the protein samples were digested by  
254 trypsin and peptides were extracted by MALDITOF-TOF mass spectrometer. Spectra were  
255 analyzed to identify the protein of interest using Mascot sequence matching software. The  
256 result indicated that the amino sequence of pscC protein specified a high ionic scoring match  
257 and similar with two peptide sequences appeared in the same protein. The protein identity  
258 and mass match were statistically more significant. Protein was analysed and noticed the one  
259 matched peptide to the same pscC protein, which was higher confidence for correct protein  
260 identified in Figure 6.

### 261 **3.3 Purification and Immunization of pscC protein in rats**

262 The crude fraction was further purified and subjected to gel filtration on a Superdex followed  
263 by purification analysis using SDS-PAGE. The chromatogram showed a mixture of monomer  
264 and dimer state. The distinct peak was observed in 40 to 47 fractions and the small picks were  
265 noticed in 22 to 41 fractions. Additional stage was precipitating the fractions followed by the  
266 protocol of Wessel and Flugge [18]. The precipitated proteins were run once again in SDS-  
267 PAGE and protein in the lane of fraction 27, 28, 29 columns presented the correct band as  
268 their predicted molecular weight of approximately ~84kDa in Figure 7.

269 After immunization, the antibody levels were measured by indirect ELISA. The result  
270 showed that the rat antibody demonstrated a positive value against the immunized pscC  
271 protein. As shown in the graphical representation in figure 8, the level of immunoglobulin

272 measured over the 0 to 5th week for all the immunized rats. The OD<sub>405</sub> Values for different  
273 weeks of serum from the post immunized blood were represented in Table 1. The 4th and 5th  
274 weeks of all groups of immunized sera were shown in positive value. Four weeks after  
275 immunization, The OD<sub>405</sub> values at 1:300 dilutions were 0.56, 0.64 and 0.63 for the low,  
276 medium and high dose respectively. Similarly, at the 5 weeks the antibody level was further  
277 increased and the OD<sub>405</sub> value at 1:300 dilutions to 0.80, 1.04 and 1.22 for the low, medium  
278 and high dose respectively. Though for the titer measurement, a standard was needed since  
279 we do not have. The OD value of unimmunized and immunized serum was compared in  
280 rodent model. It was found that immunized OD value was 2 to 3 folds higher than the  
281 control OD value after 3 weeks. The result illustrated that the rat antibody demonstrated a  
282 positive value against the immunized serum based on OD value. The levels of the humoral  
283 immune responses showed higher antibody of Ag-specific serum immunoglobulin compared  
284 to with the controls group. The control groups were always (Group-1) negative to the pscC  
285 antigen throughout the study. The humoral immune responses were detected in all plasmid  
286 immunized groups and continued increasing after 4th weeks of immunization as indicated by  
287 the antibody level. The increased antibody was dose dependant until the 5th weeks. It was  
288 noted that the medium dose (100 µg) and higher dose (150 µg) of protein antigen elicited a  
289 stronger immune response as compared to the lower dose (50µg).

290 *Pseudomonas aeruginosa* is a major cause of most opportunistic and nosocomial  
291 infections. Although conventional antibiotics are more resistance to *Pseudomonas* organism,  
292 now it is challenging to find an alternative immunize therapy. In these circumstances, a  
293 monoclonal antibody-based approach is still exploration for the inhibition of *Pseudomonas*  
294 infection [19]. Monoclonal antibodies have been established to improve of bacterial  
295 permission, stop the colonization and invasion, and avoid the destruction which is triggered  
296 by cytotoxic influences [20]. During the past few years, recombinant protein vaccines have

297 shown the highest innovation in modern medical technology. Immunization with microbial  
298 antigen has delivered the protective immunity in animal models and considered a potential  
299 useful vaccine strategy [21]. Based on previous findings, there are various kinds of  
300 immunization have been observed against *Pseudomonas* infection such as killed vaccine [22],  
301 purified outer membrane subunit vaccine [23], plasmid immunization [24] and synthetic  
302 peptide immunization [25]. The immune response in a mouse animal model to consecutive  
303 recombinant protein base vaccine could able to neutralizing the bacterial virulent toxin [26].  
304 It is supported that the use of genetic immunization technique in which a random assortment  
305 of genes from a bacteria's genome to practice for immunization purposes [27]. So, it is  
306 supposed to be clear that immunization is the best way of protection against outer membrane  
307 secretin antigen of T3SS.

308         A previous study described about the immunogenicity of *Pseudomonas* cap segment  
309 (PcrV) of T3SS needle protein. The anti-PcrV monoclonal antibodies were detected after  
310 recombinant PcrV protein was used to immunize in a mouse model. The subgroup of anti-  
311 PcrV antibody can repressed T3SS function which was observed in cell lysis assay and  
312 designed for assessment of protective activity in a *P. aeruginosa* mouse acute pneumonia  
313 [28]. Protection or defence in animal models gives only the recommendation of the potential  
314 efficiency of that vaccine in humans [29]. Recently, Mingzi *et al.*, 2014 have published the  
315 immunogenicity of pcrV gene (T3SS) encoding needle protein was immunized on mice and  
316 evaluated the efficiency of vaccines in *Pseudomonas* encoding single antigen [30]. The  
317 results revealed that mammalian expression vector with the pcrV gene could elicit a sufficient  
318 level of specific antigen to induce the humoral antibody. Based on Brain *et al.*, 2001 study,  
319 outer membrane of oprF gene of *P. aeruginosa* was immunized by plasmid that indicated that  
320 the efficacy of this vaccine can be able to elicited anti-oprF that confers protection of rodents  
321 against chronic pulmonary infection. Moreover, the results are similar to previous published

322 results producing defence mechanism in rodent models by immunization with purified outer  
323 membrane protein from *P. aeruginosa* [31].

324         The fact is, without testing its effectiveness in animal models, the recombinant  
325 antigen has not yet been applied to induce in the human body for assessment of their efficacy  
326 and level of immune responses. It is necessary to conduct a challenging experiment in which  
327 live *Pseudomonas* can be injected into immune animals to examine the viability of rat and  
328 colony contents of *Pseudomonas* spp. Our further expectation, we tried to determine an  
329 applicable vaccine against *Pseudomonas* for clinical trial. Clinical challenge is essential for  
330 recombinant antigen efficacy in animal models for assessing their efficacy and level of  
331 immune responses. It was also not clear yet, what about the optimal vaccine modalities to  
332 induce potent neutralizing antibody responses or to strong humoral immune respond ensures  
333 capable to destroy against the infected cell. It is factual that, the recombinant protein vaccine,  
334 which is able to induce protection from *Pseudomonas* infection, might be more realistic for  
335 ending global.

336         In précis, it is an appropriate challenging strategy for exploration of surface T3SS  
337 pscC antigen, which has been characterized from *P. aeruginosa* PAO1 genome as a vaccine  
338 candidate. The pscC gene (1.46 kb) encodes a 57-kDa immunogenic outer membrane  
339 associated protein of *P. aeruginosa* PAO1 strain. The protein was characterized in SDS-  
340 PAGE and purified from *E. coli* as a fusion protein to identify anti-pscC specific antibodies in  
341 the serum of Sparagury rat. Therefore, it is posited that recombinant pscC protein is capable  
342 of becoming a strong carrier and processor for the presentation of target foreign peptides in  
343 MHC II to stimulate the T helper cell based humoral immune system in a host cell. The  
344 expectations for treatment and prevention of human disease by immunization are changing,  
345 and the recurrent refinement of these abilities signify a fit for the current as well as the future  
346 manufacture of a vaccine platform against *Pseudomonas* infection.



348 **4. CONCLUSION**

349 This study provides preliminary experimental evidence indicating that the outer membrane  
350 protein pscC can serve as an elicitor of the humoral immune response in rats. We recommend  
351 that future studies focus on a larger sample size and explore a range of open reading frames  
352 to determine the precise location of the antigenic component of the pscC protein.

353

354

355 **BIOSAFETY AND ANIMAL ETHICS**

356 The study was approved by the Biotechnology Research Institute Institutional Biosafety  
357 Committee (BRIBC). The animal study was carried out in the Level 3 Biological  
358 Containment Facility (ABSL-3) at the Biotechnology Research Institute, Universiti Malaysia  
359 Sabah.

360 Recombinant protein expression procedures were carried out using *Escherichia coli* (BL21)  
361 which is classified as a (B) strain that is exempted under the Malaysian Biosafety Law.

362

363



364 **5. REFERENCES**

365

366 1. Driscoll JA, Brody SL, Kollef MH. The epidemiology, pathogenesis, and treatment of  
367 *Pseudomonas aeruginosa* infections. *Journal of Drugs*. 2007; 67: 351-368.

368 2. Daniels C, Griffiths C, Cowles B, Lam J. *Pseudomonas aeruginosa* O-antigen chain length  
369 is determined before ligation to lipid a core. *Journal of Environmental Microbiology*. 2002; 4:  
370 883–897.

371 3. Bernhardt TG, Wang IN, Struck DK, Young R. Breaking free: "protein antibiotics" and  
372 phage lysis. *Research Journal of Microbiology*. 2002; 153: 493-501.

373 4. Zhang, L, Li XZ, Poole K. Fluoroquinolone susceptibilities of efflux–mediated multidrug  
374 resistant *Pseudomonas aeruginosa*, *Stenotrophomonas maltophilia* and *Burkholderia cepacia*.  
375 *Journal of Antimicrobial Chemotherapy*. 2001; 48: 549–552.

376 5. Cryz, SJ Jr, Pitt TL, Furer E, Germanier R. Role of lipopolysaccharide in virulence of  
377 *Pseudomonas aeruginosa*. *Journal of Infection and Immunology*. 1984; 44: 508-513.

378 6. Ruano-Gallego D, Álvarez B, Fernández LÁ. Engineering the Controlled Assembly of  
379 Filamentous Injectisomes in *E. coli* K-12 for Protein Translocation into Mammalian Cells.  
380 *ACS synthetic biology*. 2015; 4:1030-1041.

381 7. Amanna I, Slifka M. Contributions of humoral and cellular immunity to vaccine-induced  
382 protection in humans. *Journal of Virology*. 2011; 411: 206–215.

383 8. Chen LM, Briones G, Donis R.O, Galan JE. Optimization of the delivery of heterologous  
384 proteins by the *Salmonella enterica* serovar *Typhimurium* type III secretion system for  
385 vaccine development. *Journal of Microbiology, Immunology and Infection*. 2006; 74: 5826–  
386 5833.

387 9. Galan JE, Wolf-Watz H. Protein delivery into eukaryotic cells by type III secretion  
388 machines. *Nature*. 2006; 444: 567–573.

- 389 10. Perez O, Batista-Duharte A, Gonzalez E, Zayas C, Balboa J, Cuello M, et al. Human  
390 prophylactic vaccine adjuvants and their determinant role in new vaccine formulations.  
391 Brazilian Journal of Medical and Biological Research. 2012; 45:681–692.
- 392 11. Nascimento IP, Leite LC. Recombinant vaccines and the development of new vaccine  
393 strategies. Brazilian Journal of Medical and Biological Research. 2012; 45:1102–1111.
- 394 12. Buatois V, Baillet M, Becart S, Mooney N, Leserman L, Machy P. MHC class II-peptide  
395 complexes in dendritic cell lipid microdomains initiate the CD4 Th1 phenotype. Journal of  
396 Immunology. 2003; 171: 5812–5819
- 397 13. Chlibek R, Bayas JM, Collins, H, et al. Safety and immunogenicity of an AS01-  
398 adjuvanted varicella-zoster virus subunit candidate vaccine against herpes zoster in adults  
399  $\geq 50$  years of age. The Journal of Infectious Diseases. 2013; 208(12): 1953-1961
- 400 14. Stober D, Trobonjaca Z, Reimann J, Schirmbeck R. Dendritic cells pulsed with  
401 exogenous hepatitis B surface antigen particles efficiently present epitopes to MHC class I-  
402 restricted cytotoxic T cells. European Journal of Immunology. 2002; 32: 1099–1108.
- 403 15. Aljanabi SM, Martinez I. Universal and rapid salt-extraction of high quality genomic  
404 DNA for PCR based techniques. Journal of Nucleic Acids Research. 1997; 25: 4692-4693.
- 405 16. Li X, Sui X, Zhang Y, Sun Y, Zhao Y, Zhai Y, Wang Q. An improvised calcium chloride  
406 method preparation and transformation of competent cells. African Journal of Biotechnology.  
407 2010; 9:8549–8554.
- 408 17. Bringans S, Eriksen S, Kendrick T, Gopalakrishnakone P, Livk A, Lock R, Lipscombe R.  
409 Proteomic analyses of the venom of *Heterometrus longimanus* (Asian black scorpion).  
410 Journal of Proteomics. 2008; 8: 1084-1096.
- 411 18. Wessel D, Flugge UI. A method for the quantitative recovery of protein in dilute solution  
412 in the presence of detergent and lipids. Journal of Analytical Biochemistry. 1984; 138: 141-  
413 143.

- 414 19. Saylor C, Dadachova E, Casadevall A. Monoclonal antibody-based therapies for  
415 microbial diseases. *Vaccine*. 2009; 27(6): G38–G46.
- 416 20. Tkaczyk C, Hua L, Varkey R, Shi Y, Dettinger L, Woods R, Barnes A, MacGill RS,  
417 Wilson S, Chowdhury P, Stover CK, Sellman BR. Identification of anti-alpha toxin  
418 monoclonal antibodies that reduce the severity of *Staphylococcus aureus* dermonecrosis and  
419 exhibit a correlation between affinity and potency. *Clinical and Vaccine Immunology*. 2012;  
420 19:377–385.
- 421 21. Fynan EF, Webster RG, Fuller DH, Haynes JR, Santoro JC, Robinson HL. DNA  
422 vaccines: prospective immunizations by parenteral, mucosal and gene-gun inoculations.  
423 *Proceedings of the National Academy of Sciences, USA*. 1993; 90: 11478-11482.
- 424 22. Cripps AW, Dunkley ML, Clancy RL. Mucosal and systemic immunizations with killed  
425 *Pseudomonas aeruginosa* protect against acute respiratory infection in rats. *Journal of*  
426 *Microbiology, Immunology and Infection*. 1994; 62: 1427–1436.
- 427 23. Lee N, Ahn B, Kim YG, Kim H, Park WJ. Conformation-dependent antibody response to  
428 *Pseudomonas aeruginosa* outer membrane proteins induced by immunization in humans.  
429 *Journal of Medical Microbiology*. 2000; 27: 79–85.
- 430 24. Robinson HL, Ginsberg HS, Davis HL, Johnston, SA, Liu MA. The scientific future of  
431 DNA for immunization. *American Academy of Microbiology critical issues colloquia*. 1997.  
432 Washington, D.C.
- 433 25. Gilleland HE, Jr, Gilleland L B, Staczek J, Harty RN, Garcia-Sastre A, Palase P, Brennan  
434 FR, Hamilton WDO, Bendahmane M, Beachy RN. Chimeric animal and plant viruses  
435 expressing epitopes of outer membrane protein F as a combined vaccine against  
436 *Pseudomonas aeruginosa* lung infection. *FEMS Immunology and Medical Microbiology*.  
437 2000; 27:291–297

- 438 26. Anderson R, Gao XM, Papakonstantinou A, Roberts M, Dougan G. Immune  
439 response in mice following immunization with DNA encoding fragment C of tetanus toxin.  
440 Journal of Infectious Diseases and Immunity. 1996; 64: 3168-3173.
- 441 27. Barry MA, Lai WC, Johnston SA. Protection against *Mycoplasma* infection using  
442 expression-library immunization. Nature. 1995; 377: 632-635.
- 443 28. Paul W, Reena V, Bonnell JC, DiGiandomenico A, Camara M, Cook K, Peng L, Zha J,  
444 Chowdury, Sellman B, Stover CK. A novel anti-PcrV antibody providing enhanced  
445 protection against *Pseudomonas aeruginosa* in multiple animal infection models.  
446 Antimicrobial Agents and Chemotherapy. 2014; 58:4384–4391.
- 447 29. Brian M, Price, Darrell R, Galloway, Harry E, Gilleland. Protection against *Pseudomonas*  
448 *aeruginosa* Chronic Lung Infection in Mice by Genetic Immunization against Outer  
449 Membrane Protein F (OprF) of *P. aeruginosa*. Journal of Infection and Immunity. 2001; 69  
450 (5): 3510-3515.
- 451 30. Mingzi J, Jing Y, Ganzhu F. Protective effect of DNA vaccine encoding *Pseudomonas*  
452 exotoxin against acute pulmonary *Pseudomonas aeruginosa* infection. Journal of PLOS  
453 Pathogen. 2014; 9(5): e96609.
- 454 31. Fox CW, Campbell GD, Anderson MM, Zavecz JH, Gilleland LB, Gilleland HE.  
455 Preservation of pulmonary function by an outer membrane protein F vaccine: a study in rats  
456 with chronic pulmonary infection caused by *Pseudomonas aeruginosa*. Journal of Chest.  
457 1994; 105: 1545–1550.
- 458
